# Supplementary material
Source: PubMed Central journal article supplement (PMC8318566)
Supplement: str-52-2096-s003.pdf [file str-52-2096-s003.pdf]

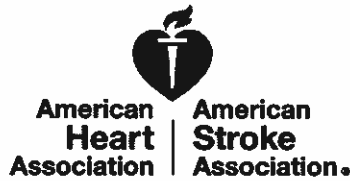

**Acknowledgment Permission Form**

Journal Stroke  
 Manuscript Number STROKE/2020/030565  
 First Author Andrew Demchuk  
 Title of Work Hemostatic Efficacy and Anti-FXa Reversal With Andexanet Alfa in Intracranial Hemorrhage: ANNEXA-4 Substudy

Authors must provide written permission/approval from all individuals mentioned by name in the Acknowledgments section of a submitted manuscript. By signing this form, any and all acknowledged persons therefore state that they have read and approved the mention of their names in the Acknowledgment section of the aforementioned paper.

|           |                              |                                                                                                     |                         |
|-----------|------------------------------|-----------------------------------------------------------------------------------------------------|-------------------------|
| Name (1)  | <u>Dr. Fahad Al-Ajlan</u>    | Signature <u></u> | Date <u>Jan 24 2021</u> |
| Name (2)  | <u>Dr. Aziz Al-Sultan</u>    | Signature _____                                                                                     | Date _____              |
| Name (3)  | <u>Ms. Ana Alvarez</u>       | Signature _____                                                                                     | Date _____              |
| Name (4)  | <u>Dr. Hyun Suk Choi</u>     | Signature _____                                                                                     | Date _____              |
| Name (5)  | <u>Dr. Henrik Gensicke</u>   | Signature _____                                                                                     | Date _____              |
| Name (6)  | <u>Ms. MacKenzie Horn</u>    | Signature _____                                                                                     | Date _____              |
| Name (7)  | <u>Dr. Linda Kasickova</u>   | Signature _____                                                                                     | Date _____              |
| Name (8)  | <u>Dr. CK Kim</u>            | Signature _____                                                                                     | Date _____              |
| Name (9)  | <u>Dr. Girish Kulkarni</u>   | Signature _____                                                                                     | Date _____              |
| Name (10) | <u>Ms. Anneliese Neweduk</u> | Signature _____                                                                                     | Date _____              |
| Name (11) | <u>Dr. Dongbeom Song</u>     | Signature _____                                                                                     | Date _____              |
| Name (12) | <u>Dr. Eric E. Smith</u>     | Signature _____                                                                                     | Date _____              |
| Name (13) | _____                        | Signature _____                                                                                     | Date _____              |
| Name (14) | _____                        | Signature _____                                                                                     | Date _____              |
| Name (15) | _____                        | Signature _____                                                                                     | Date _____              |
| Name (16) | _____                        | Signature _____                                                                                     | Date _____              |
| Name (17) | _____                        | Signature _____                                                                                     | Date _____              |
| Name (18) | _____                        | Signature _____                                                                                     | Date _____              |
| Name (19) | _____                        | Signature _____                                                                                     | Date _____              |
| Name (20) | _____                        | Signature _____                                                                                     | Date _____              |

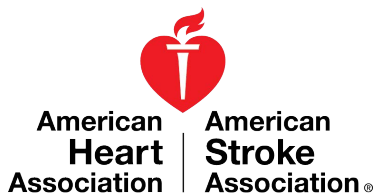

## Acknowledgment Permission Form

---

Journal \_\_\_\_\_ Stroke \_\_\_\_\_

Manuscript Number \_\_\_\_\_ STROKE/2020/030565 \_\_\_\_\_

First Author \_\_\_\_\_ Andrew Demchuk \_\_\_\_\_

Title of Work \_\_\_\_\_ Hemostatic Efficacy and Anti-FXa Reversal With Andexanet Alfa in Intracranial Hemorrhage: ANNEXA-4 Substudy \_\_\_\_\_

Authors must provide written permission/approval from all individuals mentioned by name in the Acknowledgments section of a submitted manuscript. By signing this form, any and all acknowledged persons therefore state that they have read and approved the mention of their names in the Acknowledgment section of the aforementioned paper.

|                 |                         |                                      |                 |
|-----------------|-------------------------|--------------------------------------|-----------------|
| Name (1) _____  | Dr. Fahad Al-Ajlan_     | Signature _____                      | Date _____      |
| Name (2) _____  | Dr. Abdulaziz Al Sultan | Signature <i>Abdulaziz Al Sultan</i> | Date 4/Sep/2020 |
| Name (3) _____  | Ms. Ana Alvarez_        | Signature <i>AA</i>                  | Date _____      |
| Name (4) _____  | Dr. Hyun Suk Choi_      | Signature _____                      | Date _____      |
| Name (5) _____  | Dr. Henrik Gensicke     | Signature _____                      | Date _____      |
| Name (6) _____  | Ms. MacKenzie Horn      | Signature _____                      | Date _____      |
| Name (7) _____  | Dr. Linda Kasickova     | Signature _____                      | Date _____      |
| Name (8) _____  | Dr. CK Kim              | Signature _____                      | Date _____      |
| Name (9) _____  | Dr. Girish Kulkarni     | Signature _____                      | Date _____      |
| Name (10) _____ | Ms. Anneliese Neweduk   | Signature _____                      | Date _____      |
| Name (11) _____ | Dr. Dongbeom Song       | Signature _____                      | Date _____      |
| Name (12) _____ | Dr. Eric E. Smith       | Signature _____                      | Date _____      |
| Name (13) _____ |                         | Signature _____                      | Date _____      |
| Name (14) _____ |                         | Signature _____                      | Date _____      |
| Name (15) _____ |                         | Signature _____                      | Date _____      |
| Name (16) _____ |                         | Signature _____                      | Date _____      |
| Name (17) _____ |                         | Signature _____                      | Date _____      |
| Name (18) _____ |                         | Signature _____                      | Date _____      |
| Name (19) _____ |                         | Signature _____                      | Date _____      |
| Name (20) _____ |                         | Signature _____                      | Date _____      |

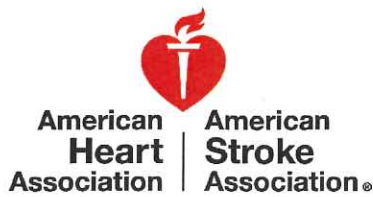

## Acknowledgment Permission Form

---

Journal Stroke  
Manuscript Number STROKE/2020/030565

First Author Andrew Demchuk

Title of Work Hemostatic Efficacy and Anti-FXa Reversal With Andexanet Alfa in Intracranial Hemorrhage: ANNEXA-4 Substudy

Authors must provide written permission/approval from all individuals mentioned by name in the Acknowledgments section of a submitted manuscript. By signing this form, any and all acknowledged persons therefore state that they have read and approved the mention of their names in the Acknowledgment section of the aforementioned paper.

|           |                              |                                                 |                        |
|-----------|------------------------------|-------------------------------------------------|------------------------|
| Name (1)  | <u>Dr. Fahad Al-Ajlan</u>    | Signature _____                                 | Date _____             |
| Name (2)  | <u>Dr. Aziz Al-Sultan</u>    | Signature _____                                 | Date _____             |
| Name (3)  | <u>Ms. Ana Alvarez</u>       | Signature <u><i>[Handwritten Signature]</i></u> | Date <u>2020-09-02</u> |
| Name (4)  | <u>Dr. Hyun Suk Choi</u>     | Signature _____                                 | Date _____             |
| Name (5)  | <u>Dr. Henrik Gensicke</u>   | Signature _____                                 | Date _____             |
| Name (6)  | <u>Ms. MacKenzie Horn</u>    | Signature _____                                 | Date _____             |
| Name (7)  | <u>Dr. Linda Kasickova</u>   | Signature _____                                 | Date _____             |
| Name (8)  | <u>Dr. CK Kim</u>            | Signature _____                                 | Date _____             |
| Name (9)  | <u>Dr. Girish Kulkarni</u>   | Signature _____                                 | Date _____             |
| Name (10) | <u>Ms. Anneliese Neweduk</u> | Signature _____                                 | Date _____             |
| Name (11) | <u>Dr. Dongbeom Song</u>     | Signature _____                                 | Date _____             |
| Name (12) | <u>Dr. Eric E. Smith</u>     | Signature _____                                 | Date _____             |
| Name (13) | _____                        | Signature _____                                 | Date _____             |
| Name (14) | _____                        | Signature _____                                 | Date _____             |
| Name (15) | _____                        | Signature _____                                 | Date _____             |
| Name (16) | _____                        | Signature _____                                 | Date _____             |
| Name (17) | _____                        | Signature _____                                 | Date _____             |
| Name (18) | _____                        | Signature _____                                 | Date _____             |
| Name (19) | _____                        | Signature _____                                 | Date _____             |
| Name (20) | _____                        | Signature _____                                 | Date _____             |

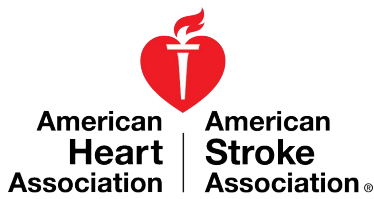

## Acknowledgment Permission Form

---

Journal \_\_\_\_\_ Stroke \_\_\_\_\_  
 Manuscript Number \_\_\_\_\_ STROKE/2020/030565 \_\_\_\_\_  
 First Author \_\_\_\_\_ Andrew Demchuk \_\_\_\_\_  
 Title of Work \_\_\_\_\_ Hemostatic Efficacy and Anti-FXa Reversal With Andexanet Alfa in Intracranial Hemorrhage: ANNEXA-4 Substudy \_\_\_\_\_

Authors must provide written permission/approval from all individuals mentioned by name in the Acknowledgments section of a submitted manuscript. By signing this form, any and all acknowledged persons therefore state that they have read and approved the mention of their names in the Acknowledgment section of the aforementioned paper.

|                 |                             |                                                                                              |                  |
|-----------------|-----------------------------|----------------------------------------------------------------------------------------------|------------------|
| Name (1) _____  | Dr. Fahad Al-Ajlan _____    | Signature _____                                                                              | Date _____       |
| Name (2) _____  | Dr. Aziz Al-Sultan _____    | Signature _____                                                                              | Date _____       |
| Name (3) _____  | Ms. Ana Alvarez _____       | Signature _____                                                                              | Date _____       |
| Name (4) _____  | Dr. Hyun Seok Choi _____    | Signature 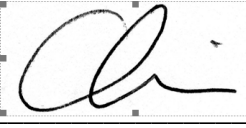 | Date 8 Sept 2020 |
| Name (5) _____  | Dr. Henrik Gensicke _____   | Signature _____                                                                              | Date _____       |
| Name (6) _____  | Ms. MacKenzie Horn _____    | Signature _____                                                                              | Date _____       |
| Name (7) _____  | Dr. Linda Kasickova _____   | Signature _____                                                                              | Date _____       |
| Name (8) _____  | Dr. CK Kim _____            | Signature _____                                                                              | Date _____       |
| Name (9) _____  | Dr. Girish Kulkarni _____   | Signature _____                                                                              | Date _____       |
| Name (10) _____ | Ms. Anneliese Neweduk _____ | Signature _____                                                                              | Date _____       |
| Name (11) _____ | Dr. Dongbeom Song _____     | Signature _____                                                                              | Date _____       |
| Name (12) _____ | Dr. Eric E. Smith _____     | Signature _____                                                                              | Date _____       |
| Name (13) _____ | _____                       | Signature _____                                                                              | Date _____       |
| Name (14) _____ | _____                       | Signature _____                                                                              | Date _____       |
| Name (15) _____ | _____                       | Signature _____                                                                              | Date _____       |
| Name (16) _____ | _____                       | Signature _____                                                                              | Date _____       |
| Name (17) _____ | _____                       | Signature _____                                                                              | Date _____       |
| Name (18) _____ | _____                       | Signature _____                                                                              | Date _____       |
| Name (19) _____ | _____                       | Signature _____                                                                              | Date _____       |
| Name (20) _____ | _____                       | Signature _____                                                                              | Date _____       |

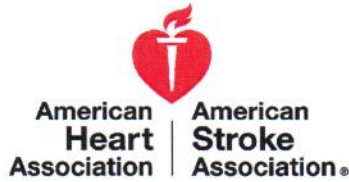

## Acknowledgment Permission Form

Journal Stroke  
Manuscript Number STROKE/2020/030565  
First Author Andrew Demchuk  
Title of Work Hemostatic Efficacy and Anti-FXa Reversal With Andexanet Alfa in Intracranial Hemorrhage: ANNEXA-4 Substudy

Authors must provide written permission/approval from all individuals mentioned by name in the Acknowledgments section of a submitted manuscript. By signing this form, any and all acknowledged persons therefore state that they have read and approved the mention of their names in the Acknowledgment section of the aforementioned paper.

|           |                              |           |                    |      |                   |
|-----------|------------------------------|-----------|--------------------|------|-------------------|
| Name (1)  | <u>Dr. Fahad Al-Ajlan</u>    | Signature | _____              | Date | _____             |
| Name (2)  | <u>Dr. Aziz Al-Sultan</u>    | Signature | _____              | Date | _____             |
| Name (3)  | <u>Ms. Ana Alvarez</u>       | Signature | _____              | Date | _____             |
| Name (4)  | <u>Dr. Hyun Suk Choi</u>     | Signature | _____              | Date | _____             |
| Name (5)  | <u>Dr. Henrik Gensicke</u>   | Signature | <u>[Signature]</u> | Date | <u>11/25/2020</u> |
| Name (6)  | <u>Ms. MacKenzie Horn</u>    | Signature | _____              | Date | _____             |
| Name (7)  | <u>Dr. Linda Kasickova</u>   | Signature | _____              | Date | _____             |
| Name (8)  | <u>Dr. CK Kim</u>            | Signature | _____              | Date | _____             |
| Name (9)  | <u>Dr. Girish Kulkarni</u>   | Signature | _____              | Date | _____             |
| Name (10) | <u>Ms. Anneliese Neweduk</u> | Signature | _____              | Date | _____             |
| Name (11) | <u>Dr. Dongbeom Song</u>     | Signature | _____              | Date | _____             |
| Name (12) | <u>Dr. Eric E. Smith</u>     | Signature | _____              | Date | _____             |
| Name (13) | _____                        | Signature | _____              | Date | _____             |
| Name (14) | _____                        | Signature | _____              | Date | _____             |
| Name (15) | _____                        | Signature | _____              | Date | _____             |
| Name (16) | _____                        | Signature | _____              | Date | _____             |
| Name (17) | _____                        | Signature | _____              | Date | _____             |
| Name (18) | _____                        | Signature | _____              | Date | _____             |
| Name (19) | _____                        | Signature | _____              | Date | _____             |
| Name (20) | _____                        | Signature | _____              | Date | _____             |

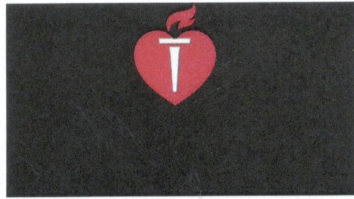

## Acknowledgment Permission Form

---

**Journal** \_\_\_\_\_ Stroke \_\_\_\_\_  
**Manuscript Number** \_\_\_\_\_ STROKE/2020/030565 \_\_\_\_\_  
**First Author** \_\_\_\_\_ Andrew Demchuk \_\_\_\_\_  
**Title of Work** \_\_\_\_\_ Hemostatic Efficacy and Anti-FXa Reversal With Andexanet Alfa in Intracranial Hemorrhage: ANNEXA-4 Substudy \_\_\_\_\_

Authors must provide written permission/approval from all individuals mentioned by name in the Acknowledgments section of a submitted manuscript. By signing this form, any and all acknowledged persons therefore state that they have read and approved the mention of their names in the Acknowledgment section of the aforementioned paper.

|           |                                   |                                 |                           |
|-----------|-----------------------------------|---------------------------------|---------------------------|
| Name (1)  | _____ Dr. Fahad Al-Ajlan _____    | Signature _____                 | Date _____                |
| Name (2)  | _____ Dr. Aziz Al-Sultan _____    | Signature _____                 | Date _____                |
| Name (3)  | _____ Ms. Ana Alvarez _____       | Signature _____                 | Date _____                |
| Name (4)  | _____ Dr. Hyun Suk Choi _____     | Signature _____                 | Date _____                |
| Name (5)  | _____ Dr. Henrik Gensicke _____   | Signature _____                 | Date _____                |
| Name (6)  | _____ Ms. MacKenzie Horn _____    | Signature <u>Mackenzie Horn</u> | Date <u>Sept. 8, 2020</u> |
| Name (7)  | _____ Dr. Linda Kasickova _____   | Signature _____                 | Date _____                |
| Name (8)  | _____ Dr. CK Kim _____            | Signature _____                 | Date _____                |
| Name (9)  | _____ Dr. Girish Kulkarni _____   | Signature _____                 | Date _____                |
| Name (10) | _____ Ms. Anneliese Neweduk _____ | Signature _____                 | Date _____                |
| Name (11) | _____ Dr. Dongbeom Song _____     | Signature _____                 | Date _____                |
| Name (12) | _____ Dr. Eric E. Smith _____     | Signature _____                 | Date _____                |
| Name (13) | _____                             | Signature _____                 | Date _____                |
| Name (14) | _____                             | Signature _____                 | Date _____                |
| Name (15) | _____                             | Signature _____                 | Date _____                |
| Name (16) | _____                             | Signature _____                 | Date _____                |
| Name (17) | _____                             | Signature _____                 | Date _____                |
| Name (18) | _____                             | Signature _____                 | Date _____                |
| Name (19) | _____                             | Signature _____                 | Date _____                |
| Name (20) | _____                             | Signature _____                 | Date _____                |

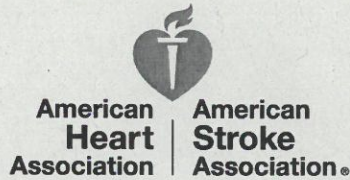

**Acknowledgment Permission Form**

Journal Stroke  
 Manuscript Number STROKE/2020/030565  
 First Author Andrew Demchuk  
 Title of Work Hemostatic Efficacy and Anti-FXa Reversal With Andexanet Alfa in Intracranial Hemorrhage: ANNEXA-4 Substudy

Authors must provide written permission/approval from all individuals mentioned by name in the Acknowledgments section of a submitted manuscript. By signing this form, any and all acknowledged persons therefore state that they have read and approved the mention of their names in the Acknowledgment section of the aforementioned paper.

|           |                              |                                         |                      |
|-----------|------------------------------|-----------------------------------------|----------------------|
| Name (1)  | <u>Dr. Fahad Al-Ajlan</u>    | Signature _____                         | Date _____           |
| Name (2)  | <u>Dr. Aziz Al-Sultan</u>    | Signature _____                         | Date _____           |
| Name (3)  | <u>Ms. Ana Alvarez</u>       | Signature _____                         | Date _____           |
| Name (4)  | <u>Dr. Hyun Suk Choi</u>     | Signature _____                         | Date _____           |
| Name (5)  | <u>Dr. Henrik Gensicke</u>   | Signature _____                         | Date _____           |
| Name (6)  | <u>Ms. MacKenzie Horn</u>    | Signature _____                         | Date _____           |
| Name (7)  | <u>Dr. Linda Kasickova</u>   | Signature <u><i>Linda Kasickova</i></u> | Date <u>8.9.2020</u> |
| Name (8)  | <u>Dr. CK Kim</u>            | Signature _____                         | Date _____           |
| Name (9)  | <u>Dr. Girish Kulkarni</u>   | Signature _____                         | Date _____           |
| Name (10) | <u>Ms. Anneliese Neweduc</u> | Signature _____                         | Date _____           |
| Name (11) | <u>Dr. Dongbeom Song</u>     | Signature _____                         | Date _____           |
| Name (12) | <u>Dr. Eric E. Smith</u>     | Signature _____                         | Date _____           |
| Name (13) |                              | Signature _____                         | Date _____           |
| Name (14) |                              | Signature _____                         | Date _____           |
| Name (15) |                              | Signature _____                         | Date _____           |
| Name (16) |                              | Signature _____                         | Date _____           |
| Name (17) |                              | Signature _____                         | Date _____           |
| Name (18) |                              | Signature _____                         | Date _____           |
| Name (19) |                              | Signature _____                         | Date _____           |
| Name (20) |                              | Signature _____                         | Date _____           |

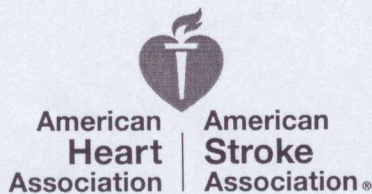

**Acknowledgment Permission Form**

Journal \_\_\_\_\_ Stroke \_\_\_\_\_  
Manuscript Number \_\_\_\_\_ STROKE/2020/030565 \_\_\_\_\_  
First Author \_\_\_\_\_ Andrew Demchuk \_\_\_\_\_  
Title of Work \_\_\_\_\_ Hemostatic Efficacy and Anti-FXa Reversal With Andexanet Alfa in Intracranial Hemorrhage: ANNEXA-4 Substudy \_\_\_\_\_

Authors must provide written permission/approval from all individuals mentioned by name in the Acknowledgments section of a submitted manuscript. By signing this form, any and all acknowledged persons therefore state that they have read and approved the mention of their names in the Acknowledgment section of the aforementioned paper.

Table with 4 columns: Name, Signature, Date. Rows 1-20. Row 8 contains handwritten signature 'Chil Kim' and date 'Dec-03-2020'.



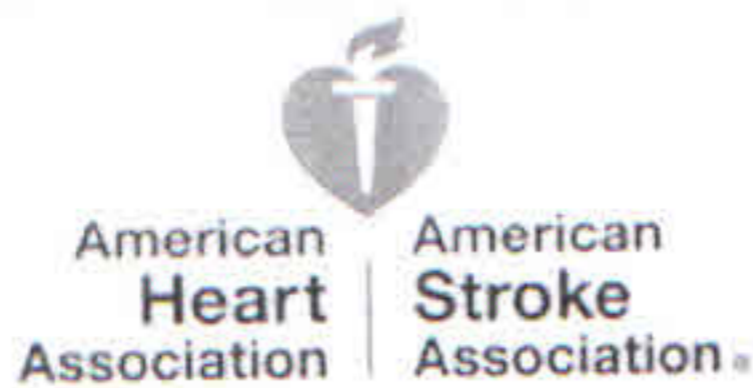

## Acknowledgment Permission Form

Journal Stroke  
Manuscript Number STROKE 2020 030565  
First Author Andrew Demchuk  
Title of Work Hemostatic Efficacy and Anti-FXa Reversal With Andexanet Alfa in Intracranial Hemorrhage: ANNEXA-4 Substudy

Authors must provide written permission approval from all individuals mentioned by name in the Acknowledgments section of a submitted manuscript. By signing this form, any and all acknowledged persons therefore state that they have read and approved the mention of their names in the Acknowledgment section of the aforementioned paper.

|           |                              |                            |                       |
|-----------|------------------------------|----------------------------|-----------------------|
| Name (1)  | <u>Dr. Fahad Al-Ajlan</u>    | Signature _____            | Date _____            |
| Name (2)  | <u>Dr. Aziz Al-Sultan</u>    | Signature _____            | Date _____            |
| Name (3)  | <u>Ms. Ana Alvarez</u>       | Signature _____            | Date _____            |
| Name (4)  | <u>Dr. Hyun Suk Choi</u>     | Signature _____            | Date _____            |
| Name (5)  | <u>Dr. Henrik Gensicke</u>   | Signature _____            | Date _____            |
| Name (6)  | <u>Ms. MacKenzie Horn</u>    | Signature _____            | Date _____            |
| Name (7)  | <u>Dr. Linda Kasickova</u>   | Signature _____            | Date _____            |
| Name (8)  | <u>Dr. CK Kim</u>            | Signature _____            | Date _____            |
| Name (9)  | <u>Dr. Girish Kulkarni</u>   | Signature <u>AKulkarni</u> | Date <u>3-09-2020</u> |
| Name (10) | <u>Ms. Anneliese Neweduk</u> | Signature _____            | Date _____            |
| Name (11) | <u>Dr. Dongbeom Song</u>     | Signature _____            | Date _____            |
| Name (12) | <u>Dr. Eric E. Smith</u>     | Signature _____            | Date _____            |
| Name (13) | _____                        | Signature _____            | Date _____            |
| Name (14) | _____                        | Signature _____            | Date _____            |
| Name (15) | _____                        | Signature _____            | Date _____            |
| Name (16) | _____                        | Signature _____            | Date _____            |
| Name (17) | _____                        | Signature _____            | Date _____            |
| Name (18) | _____                        | Signature _____            | Date _____            |
| Name (19) | _____                        | Signature _____            | Date _____            |
| Name (20) | _____                        | Signature _____            | Date _____            |

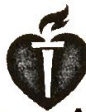

### Acknowledgment Permission Form

Journal Stroke  
 Manuscript Number STROKE/2020/030565  
 First Author Andrew Demchuk  
 Title of Work Hemostatic Efficacy and Anti-FXa Reversal With Andexanet Alfa in Intracranial Hemorrhage: ANNEXA-4 Substudy

Authors must provide written permission/approval from all individuals mentioned by name in the Acknowledgments section of a submitted manuscript. By signing this form, any and all acknowledged persons therefore state that they have read and approved the mention of their names in the Acknowledgment section of the aforementioned paper.

|           |                              |                                   |                       |
|-----------|------------------------------|-----------------------------------|-----------------------|
| Name (1)  | <u>Dr. Fahad Al-Ajlan</u>    | Signature _____                   | Date _____            |
| Name (2)  | <u>Dr. Aziz Al-Sultan</u>    | Signature _____                   | Date _____            |
| Name (3)  | <u>Ms. Ana Alvarez</u>       | Signature _____                   | Date _____            |
| Name (4)  | <u>Dr. Hyun Suk Choi</u>     | Signature _____                   | Date _____            |
| Name (5)  | <u>Dr. Henrik Gensicke</u>   | Signature _____                   | Date _____            |
| Name (6)  | <u>Ms. MacKenzie Horn</u>    | Signature _____                   | Date _____            |
| Name (7)  | <u>Dr. Linda Kasickova</u>   | Signature _____                   | Date _____            |
| Name (8)  | <u>Dr. CK Kim</u>            | Signature _____                   | Date _____            |
| Name (9)  | <u>Dr. Girish Kulkarni</u>   | Signature _____                   | Date _____            |
| Name (10) | <u>Ms. Anneliese Neweduk</u> | Signature <u><i>Anneweduk</i></u> | Date <u>Nov 24/20</u> |
| Name (11) | <u>Dr. Dongbeom Song</u>     | Signature _____                   | Date _____            |
| Name (12) | <u>Dr. Eric E. Smith</u>     | Signature _____                   | Date _____            |
| Name (13) | _____                        | Signature _____                   | Date _____            |
| Name (14) | _____                        | Signature _____                   | Date _____            |
| Name (15) | _____                        | Signature _____                   | Date _____            |
| Name (16) | _____                        | Signature _____                   | Date _____            |
| Name (17) | _____                        | Signature _____                   | Date _____            |
| Name (18) | _____                        | Signature _____                   | Date _____            |
| Name (19) | _____                        | Signature _____                   | Date _____            |
| Name (20) | _____                        | Signature _____                   | Date _____            |



## Acknowledgment Permission Form

---

**Journal** \_\_\_\_\_ **Stroke** \_\_\_\_\_  
**Manuscript Number** \_\_\_\_\_ STROKE/2020/030565 \_\_\_\_\_  
**First Author** \_\_\_\_\_ Andrew Demchuk \_\_\_\_\_  
**Title of Work** \_\_\_\_\_ Hemostatic Efficacy and Anti-FXa Reversal With Andexanet Alfa in Intracranial Hemorrhage: ANNEXA-4 Substudy \_\_\_\_\_

Authors must provide written permission/approval from all individuals mentioned by name in the Acknowledgments section of a submitted manuscript. By signing this form, any and all acknowledged persons therefore state that they have read and approved the mention of their names in the Acknowledgment section of the aforementioned paper.

|           |                                   |                             |                          |
|-----------|-----------------------------------|-----------------------------|--------------------------|
| Name (1)  | _____ Dr. Fahad Al-Ajlan _____    | Signature _____             | Date _____               |
| Name (2)  | _____ Dr. Aziz Al-Sultan _____    | Signature _____             | Date _____               |
| Name (3)  | _____ Ms. Ana Alvarez _____       | Signature _____             | Date _____               |
| Name (4)  | _____ Dr. Hyun Suk Choi _____     | Signature _____             | Date _____               |
| Name (5)  | _____ Dr. Henrik Gensicke _____   | Signature _____             | Date _____               |
| Name (6)  | _____ Ms. MacKenzie Horn _____    | Signature _____             | Date _____               |
| Name (7)  | _____ Dr. Linda Kasickova _____   | Signature _____             | Date _____               |
| Name (8)  | _____ Dr. CK Kim _____            | Signature _____             | Date _____               |
| Name (9)  | _____ Dr. Girish Kulkarni _____   | Signature _____             | Date _____               |
| Name (10) | _____ Ms. Anneliese Neweduk _____ | Signature _____             | Date _____               |
| Name (11) | _____ Dr. Dongbeom Song _____     | Signature _____             | Date _____               |
| Name (12) | _____ Dr. Eric E. Smith _____     | Signature <u>Eric Smith</u> | Date <u>Sept 4, 2020</u> |
| Name (13) | _____                             | Signature _____             | Date _____               |
| Name (14) | _____                             | Signature _____             | Date _____               |
| Name (15) | _____                             | Signature _____             | Date _____               |
| Name (16) | _____                             | Signature _____             | Date _____               |
| Name (17) | _____                             | Signature _____             | Date _____               |
| Name (18) | _____                             | Signature _____             | Date _____               |
| Name (19) | _____                             | Signature _____             | Date _____               |
| Name (20) | _____                             | Signature _____             | Date _____               |



## Acknowledgment Permission Form

---

Journal \_\_\_\_\_ Stroke \_\_\_\_\_

Manuscript Number \_\_\_\_\_ STROKE/2020/030565 \_\_\_\_\_

First Author \_\_\_\_\_ Andrew Demchuk \_\_\_\_\_

Title of Work \_\_\_\_\_ Hemostatic Efficacy and Anti-FXa Reversal With Andexanet Alfa in Intracranial Hemorrhage: ANNEXA-4 Substudy \_\_\_\_\_

Authors must provide written permission/approval from all individuals mentioned by name in the Acknowledgments section of a submitted manuscript. By signing this form, any and all acknowledged persons therefore state that they have read and approved the mention of their names in the Acknowledgment section of the aforementioned paper.

Name (1) Kimberly Fuller on behalf of Cello Health Communications\_ Signature  Date \_\_1/5/2021

Name (2) \_\_\_\_\_ Signature \_\_\_\_\_ Date \_\_\_\_\_

Name (3) \_\_\_\_\_ Signature \_\_\_\_\_ Date \_\_\_\_\_

Name (4) \_\_\_\_\_ Signature \_\_\_\_\_ Date \_\_\_\_\_

Name (5) \_\_\_\_\_ Signature \_\_\_\_\_ Date \_\_\_\_\_

Name (6) \_\_\_\_\_ Signature \_\_\_\_\_ Date \_\_\_\_\_

Name (7) \_\_\_\_\_ Signature \_\_\_\_\_ Date \_\_\_\_\_

Name (8) \_\_\_\_\_ Signature \_\_\_\_\_ Date \_\_\_\_\_

Name (9) \_\_\_\_\_ Signature \_\_\_\_\_ Date \_\_\_\_\_

Name (10) \_\_\_\_\_ Signature \_\_\_\_\_ Date \_\_\_\_\_

Name (11) \_\_\_\_\_ Signature \_\_\_\_\_ Date \_\_\_\_\_

Name (12) \_\_\_\_\_ Signature \_\_\_\_\_ Date \_\_\_\_\_

Name (13) \_\_\_\_\_ Signature \_\_\_\_\_ Date \_\_\_\_\_

Name (14) \_\_\_\_\_ Signature \_\_\_\_\_ Date \_\_\_\_\_

Name (15) \_\_\_\_\_ Signature \_\_\_\_\_ Date \_\_\_\_\_

Name (16) \_\_\_\_\_ Signature \_\_\_\_\_ Date \_\_\_\_\_

Name (17) \_\_\_\_\_ Signature \_\_\_\_\_ Date \_\_\_\_\_

Name (18) \_\_\_\_\_ Signature \_\_\_\_\_ Date \_\_\_\_\_

Name (19) \_\_\_\_\_ Signature \_\_\_\_\_ Date \_\_\_\_\_

Name (20) \_\_\_\_\_ Signature \_\_\_\_\_ Date \_\_\_\_\_

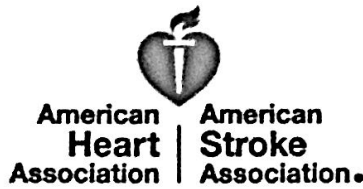

## Acknowledgment Permission Form

Journal Stroke  
Manuscript Number STROKE/2020/030565  
First Author Andrew Demchuk  
Title of Work Hemostatic Efficacy and Anti-FXa Reversal With Andexanet Alfa in Intracranial Hemorrhage: ANNEXA-4 Substudy

Authors must provide written permission/approval from all individuals mentioned by name in the Acknowledgments section of a submitted manuscript. By signing this form, any and all acknowledged persons therefore state that they have read and approved the mention of their names in the Acknowledgment section of the aforementioned paper.

|                                |                                                                                                     |                      |
|--------------------------------|-----------------------------------------------------------------------------------------------------|----------------------|
| Name (1) <u>Helene Dassule</u> | Signature <u>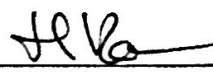</u> | Date <u>01/28/01</u> |
| Name (2) _____                 | Signature _____                                                                                     | Date _____           |
| Name (3) _____                 | Signature _____                                                                                     | Date _____           |
| Name (4) _____                 | Signature _____                                                                                     | Date _____           |
| Name (5) _____                 | Signature _____                                                                                     | Date _____           |
| Name (6) _____                 | Signature _____                                                                                     | Date _____           |
| Name (7) _____                 | Signature _____                                                                                     | Date _____           |
| Name (8) _____                 | Signature _____                                                                                     | Date _____           |
| Name (9) _____                 | Signature _____                                                                                     | Date _____           |
| Name (10) _____                | Signature _____                                                                                     | Date _____           |
| Name (11) _____                | Signature _____                                                                                     | Date _____           |
| Name (12) _____                | Signature _____                                                                                     | Date _____           |
| Name (13) _____                | Signature _____                                                                                     | Date _____           |
| Name (14) _____                | Signature _____                                                                                     | Date _____           |
| Name (15) _____                | Signature _____                                                                                     | Date _____           |
| Name (16) _____                | Signature _____                                                                                     | Date _____           |
| Name (17) _____                | Signature _____                                                                                     | Date _____           |
| Name (18) _____                | Signature _____                                                                                     | Date _____           |
| Name (19) _____                | Signature _____                                                                                     | Date _____           |
| Name (20) _____                | Signature _____                                                                                     | Date _____           |
